# Supplementary material for: In Silico Screening of Natural Compounds for Candidates 5HT6 Receptor Antagonists against Alzheimer’s Disease
Source: MDPI journal article supplement (doi:10.3390/molecules27092626), 2022-04-19
Supplement: s1 [file s1]

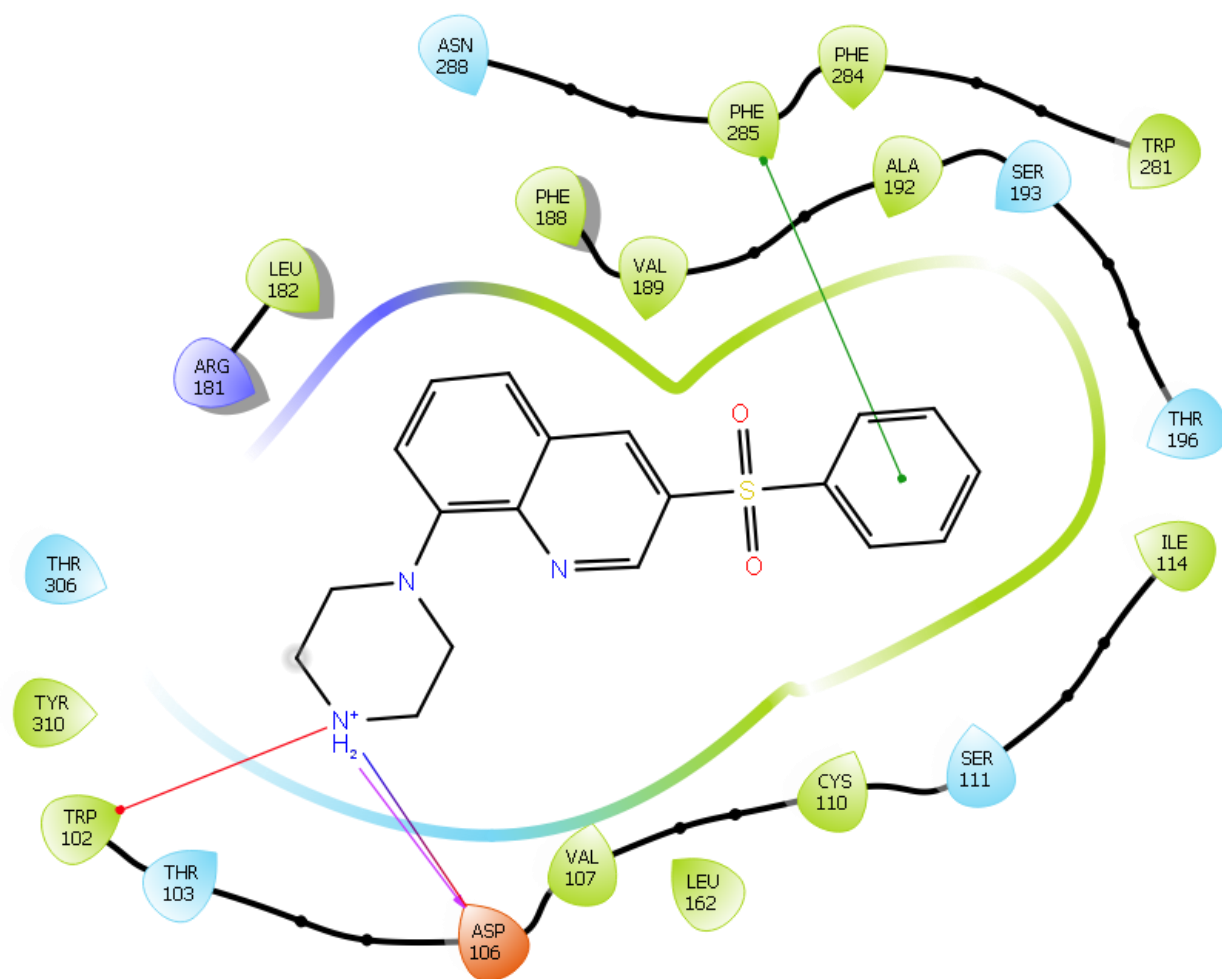

**Figure S1.** Binding pattern of Intepirdine in the active site of 5HT6 receptor

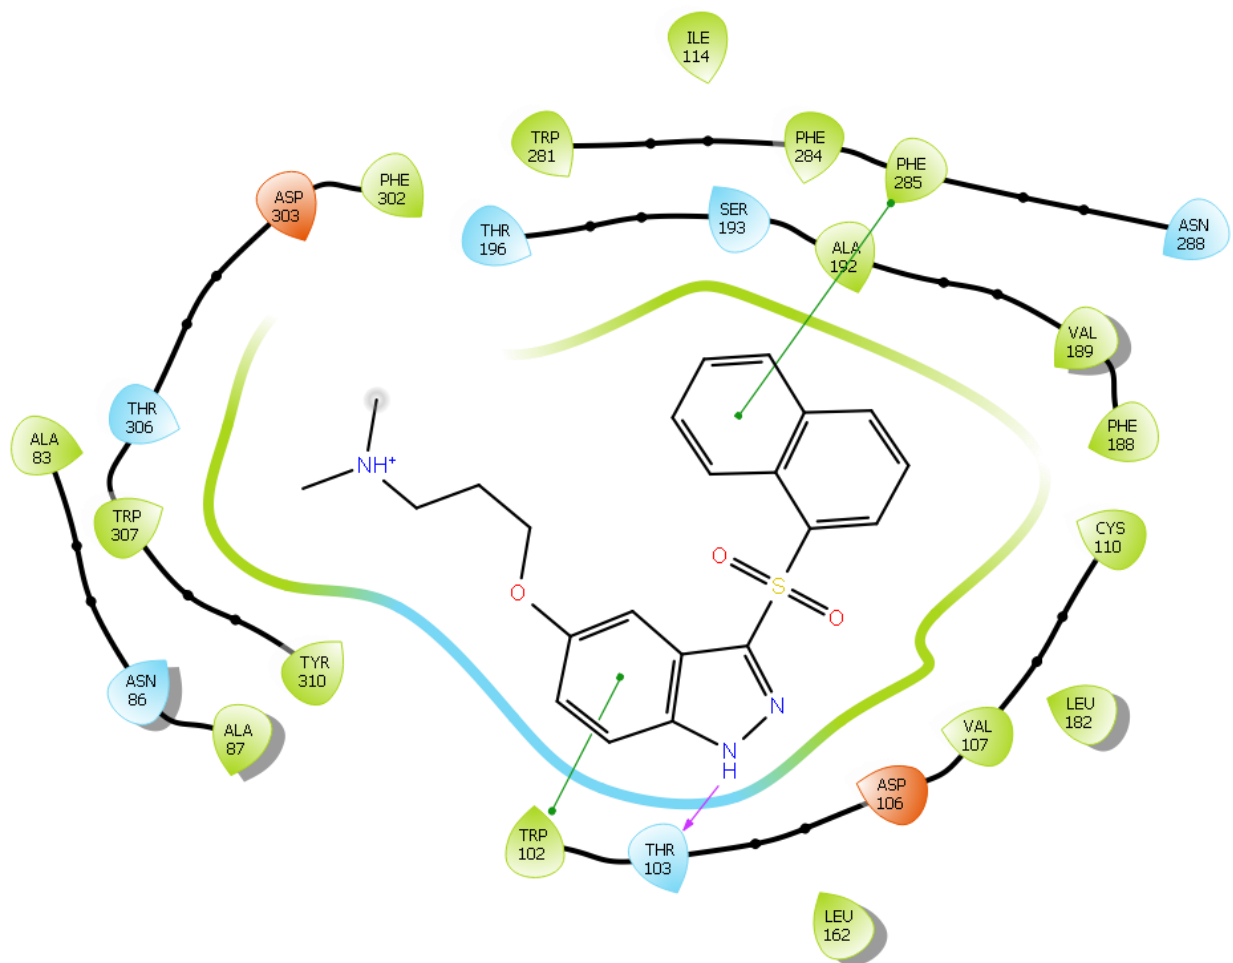

**Figure S2.** Binding pattern of Cerlapirdine in the active site of 5HT6 receptor

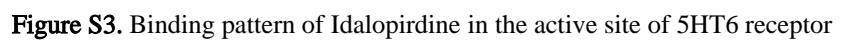

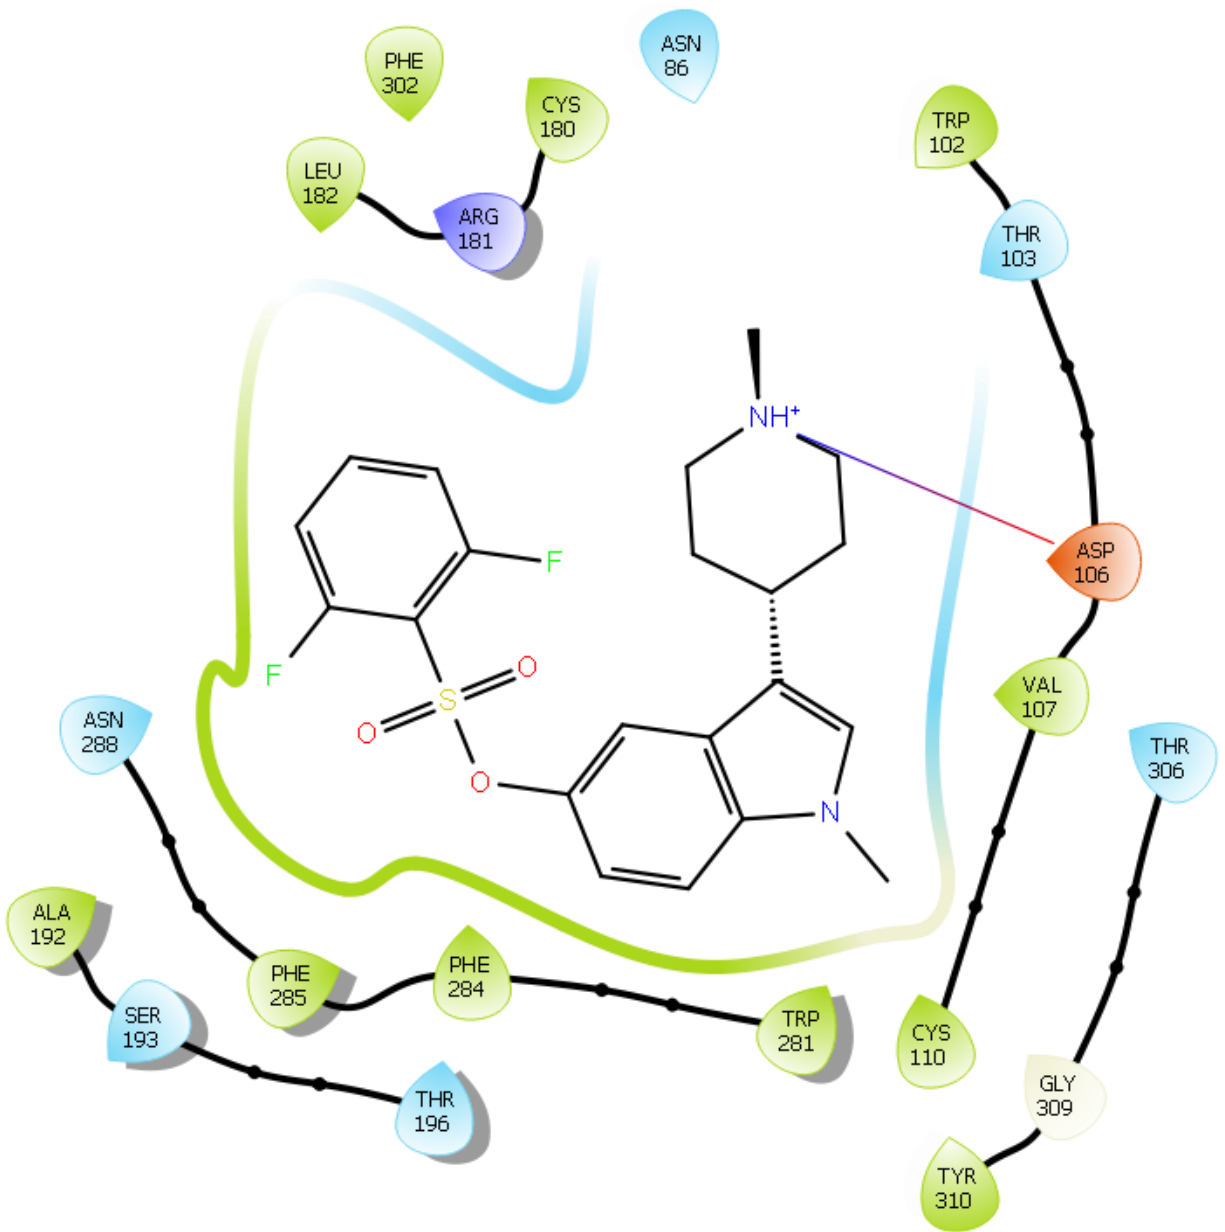

**Figure S4.** Binding pattern of SG518 in the active site of 5HT6 receptor

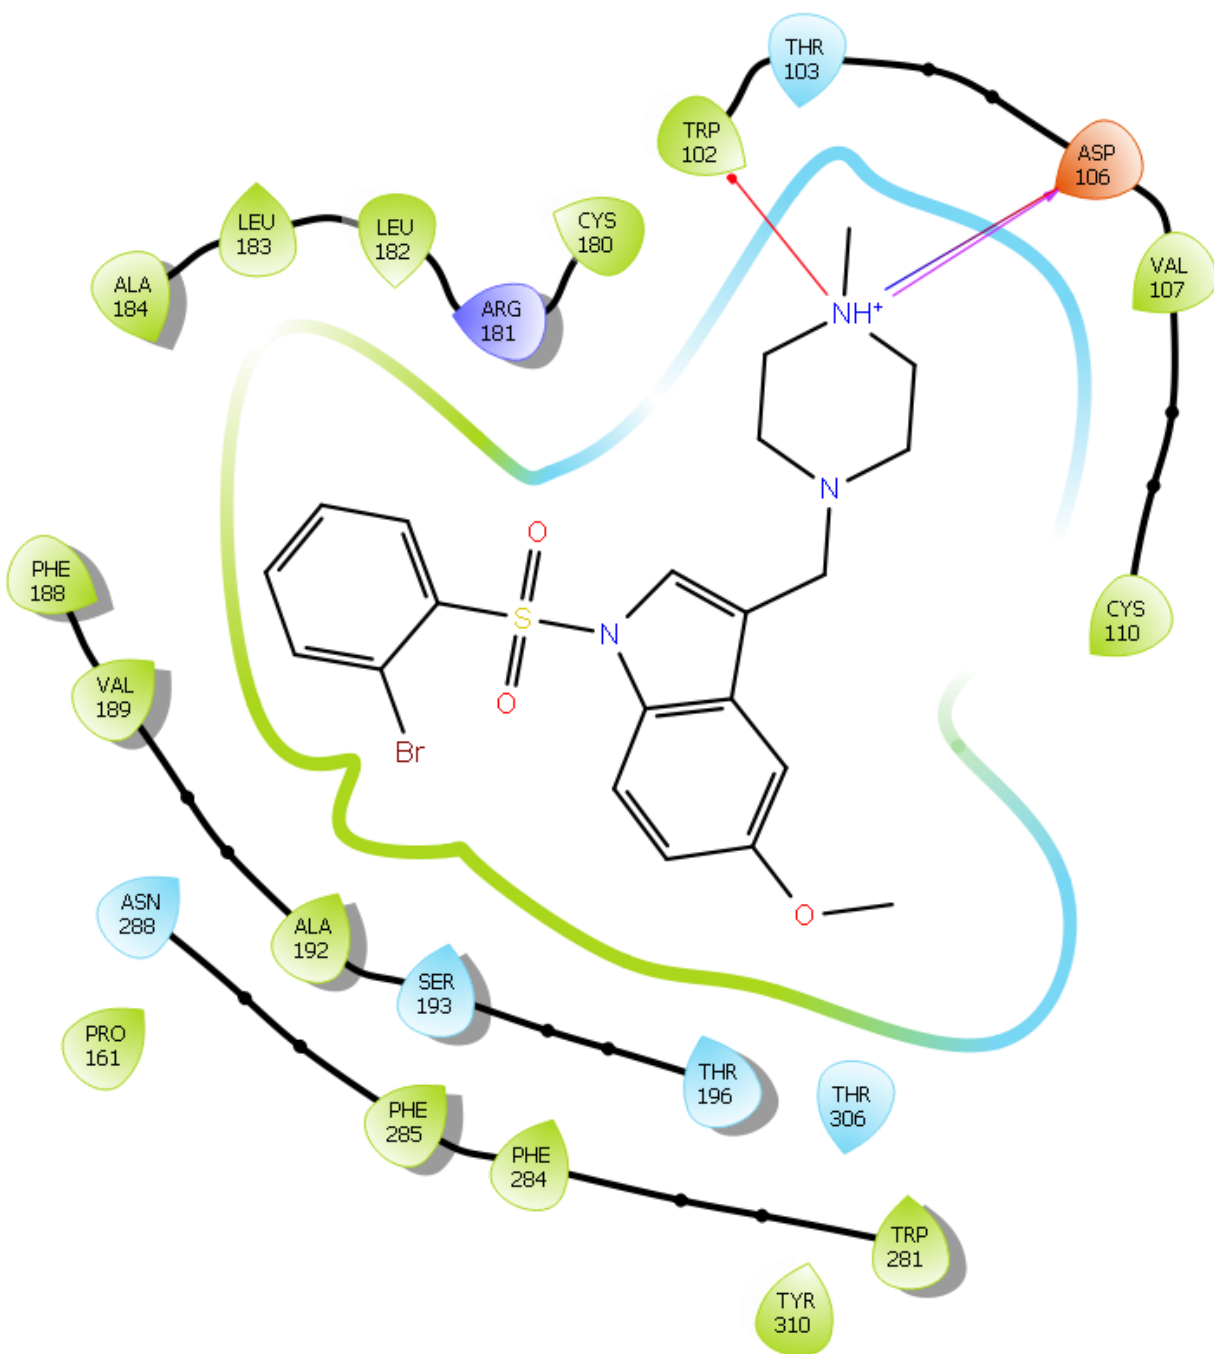

**Figure S5.** Binding pattern of Masupirdine in the active site of 5HT6 receptor

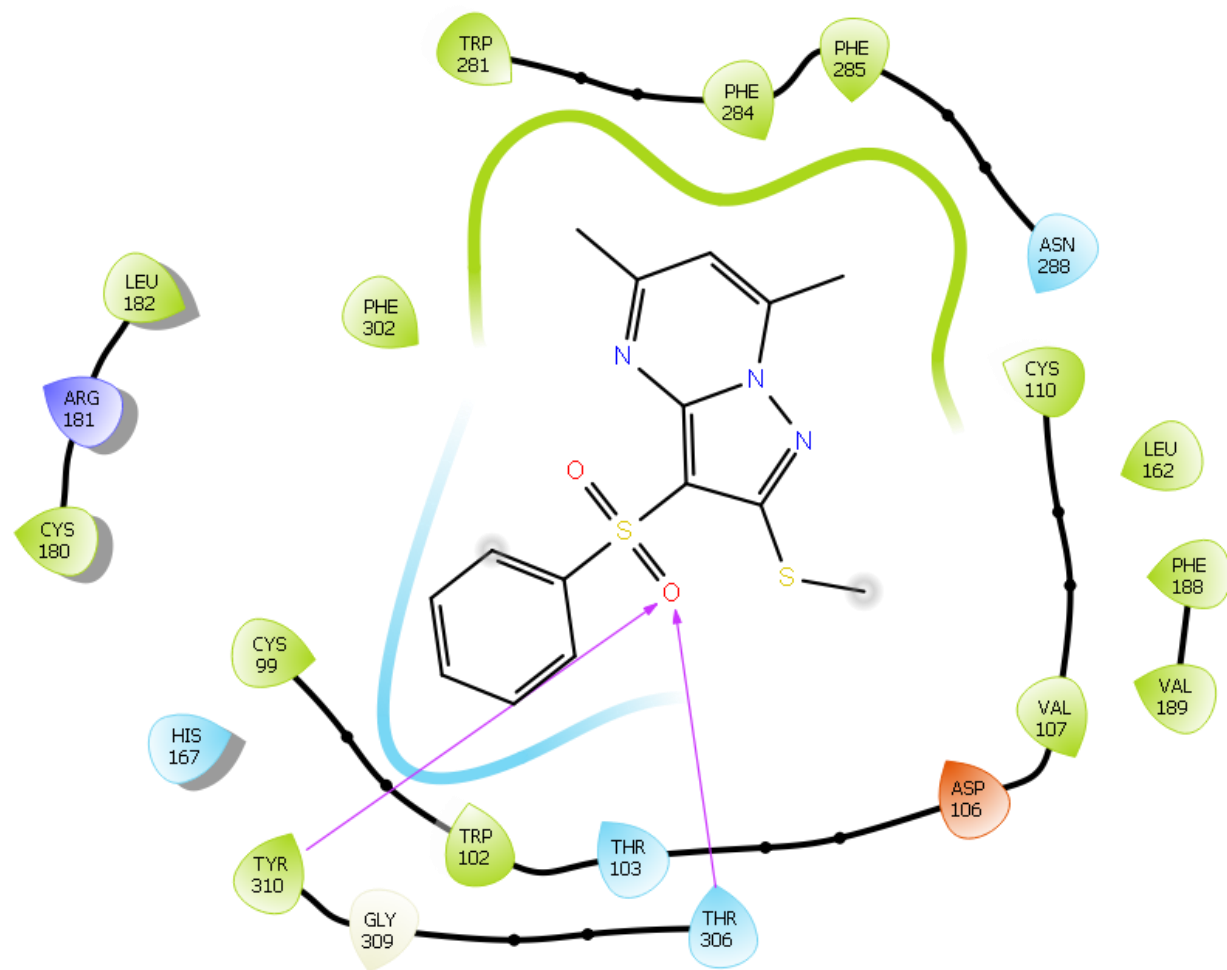

**Figure S6.** Binding pattern of AVN-211 in the active site of 5HT6 receptor

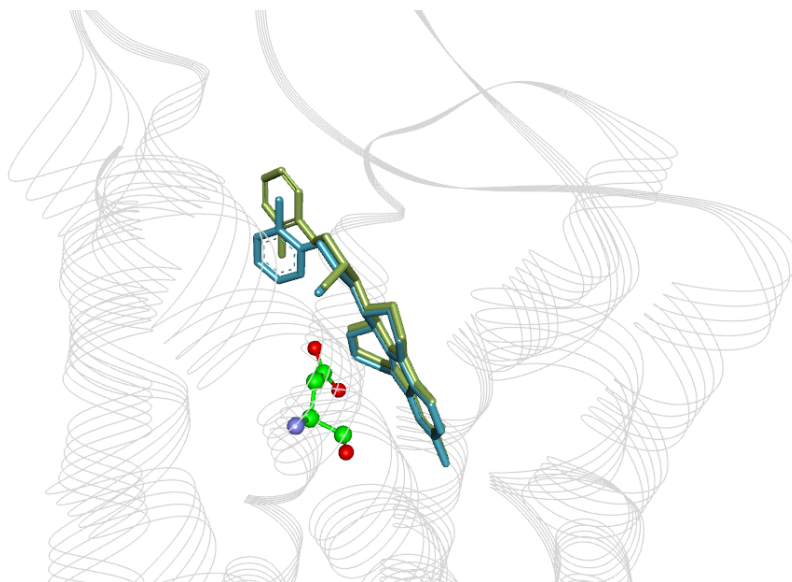

**Figure S7.** Binding modes of compound ZINC00756618, obtained by GOLD (green) and Autodock Vina (cyan)

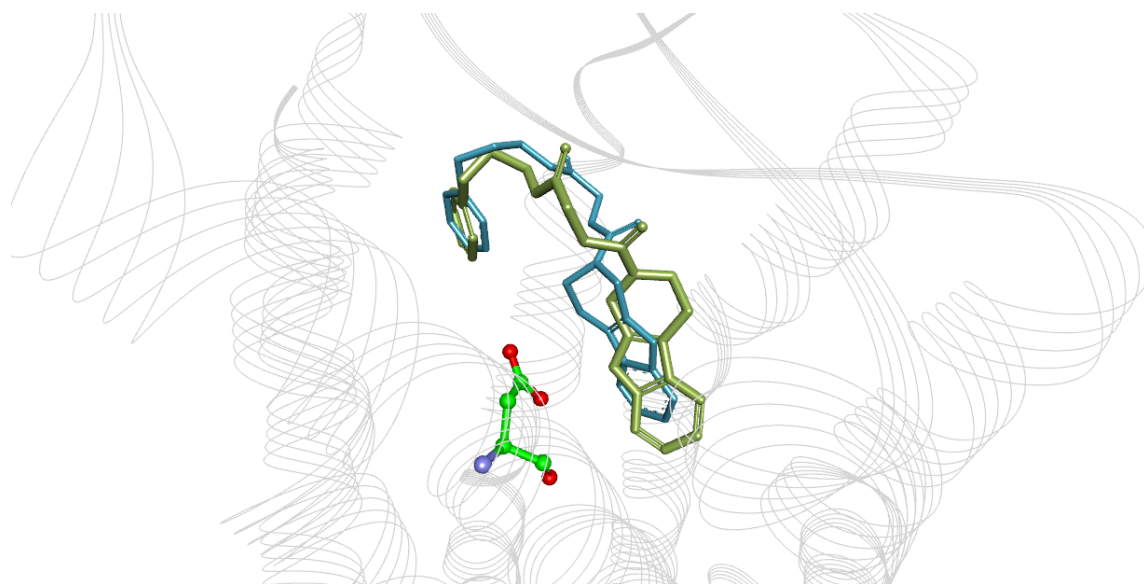

**Figure S8.** Binding modes of compound ZINC2076277, obtained by GOLD (green) and Autodock Vina (cyan)

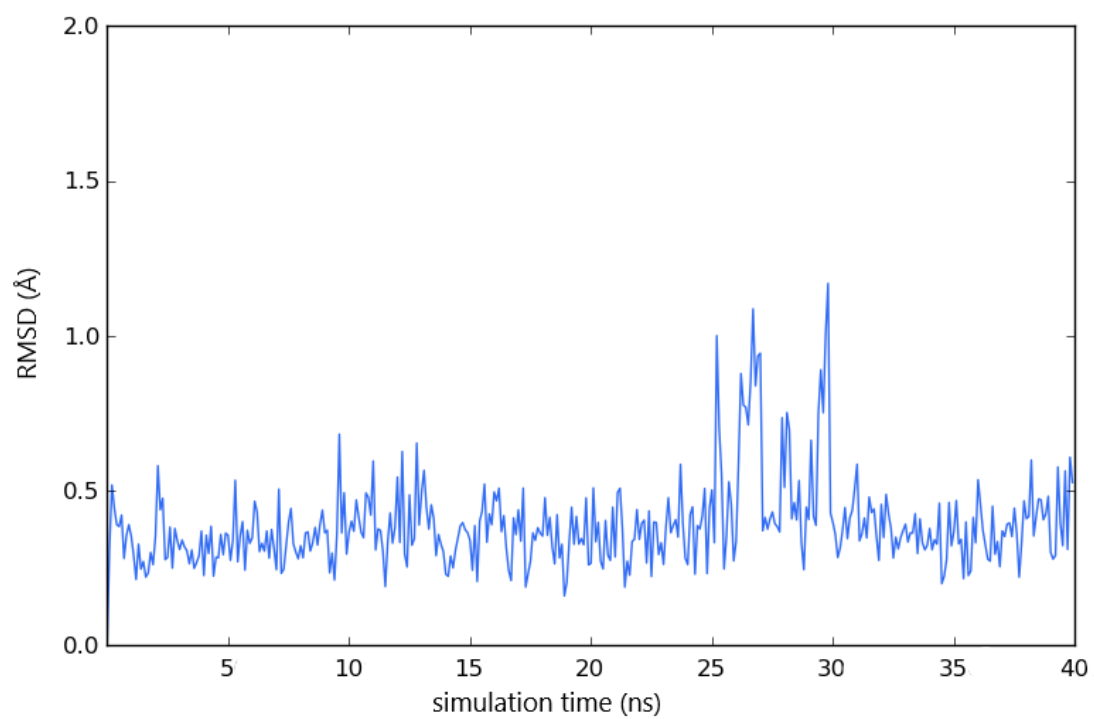

**Figure S9.** RMSD of ZINC00756618 in the binding site of 5HT6 receptor during 40ns production phase of MD simulation



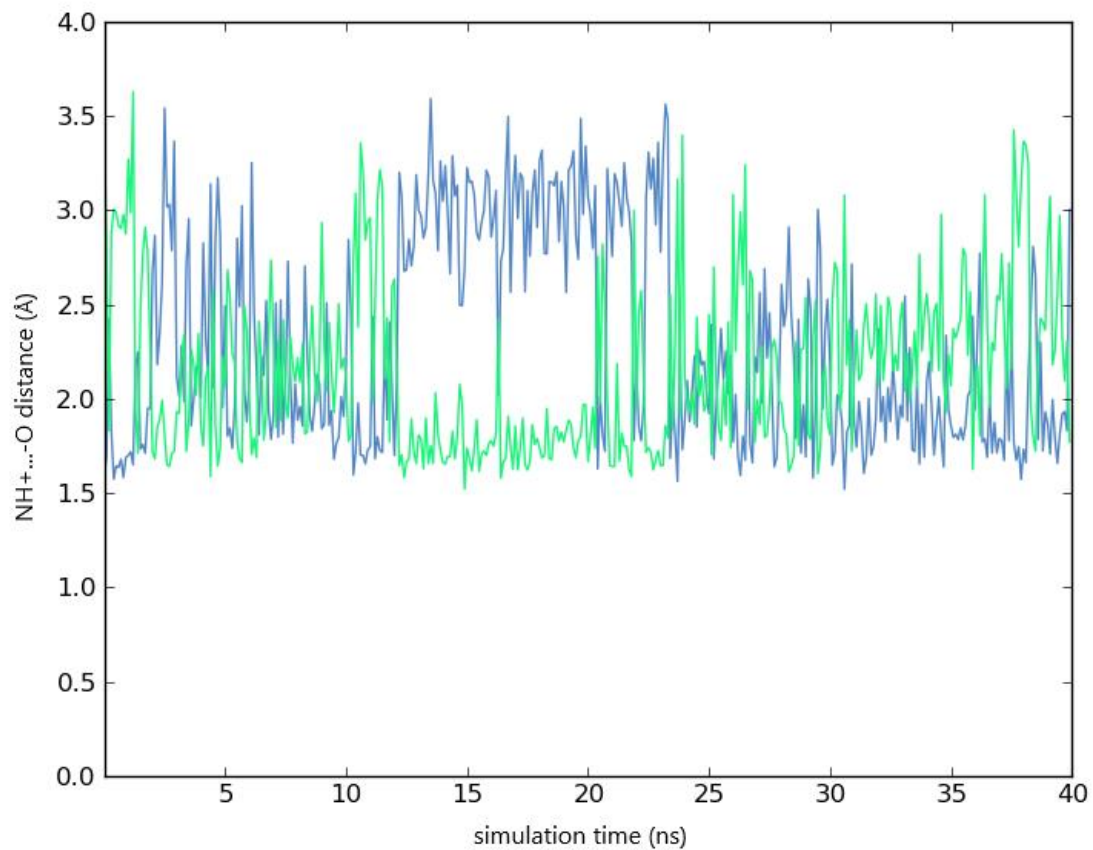

**Figure S10.** Salt bridge in 5HT6 - ZINC00756618 complex during 40ns production phase simulation, presented as interactions of NH<sup>+</sup> (ligand) and oxygens from COO<sup>-</sup> group from D3.32.

**Table S1.** List of compounds from AQVN group values 2.55 with centroid distance from the learning set

|              |        |
|--------------|--------|
| ZINC20762773 | 1.0444 |
| ZINC03880726 | 1.2448 |
| ZINC00756618 | 1.3382 |
| ZINC04081390 | 1.5085 |
| ZINC19321394 | 1.6387 |
| ZINC15121960 | 1.6589 |
| ZINC72326056 | 1.8159 |
| ZINC00322074 | 1.8524 |
| ZINC01280229 | 1.883  |
| ZINC20501905 | 1.9277 |

**Table S3.** List of compounds from AQVN group values 2.99 with centroid distance the from learning set

|              |        |
|--------------|--------|
| ZINC02115922 | 0.7866 |
| ZINC31808017 | 0.8591 |
| ZINC02122787 | 0.9713 |
| ZINC02115924 | 0.97   |
| ZINC02122785 | 0.9973 |
| ZINC02149393 | 1.0433 |
| ZINC00077345 | 1.0878 |
| ZINC12296831 | 1.3264 |
| ZINC00526223 | 1.3707 |
| ZINC12874403 | 1.4146 |

**Table S2.** List of compounds from AQVN group values 2.72 with centroid distance from the learning set

|              |        |
|--------------|--------|
| ZINC18277049 | 0.8405 |
| ZINC18277048 | 0.9327 |
| ZINC08764971 | 1.0001 |
| ZINC04061177 | 1.2124 |
| ZINC19323606 | 1.2864 |
| ZINC08764993 | 1.3484 |
| ZINC72324535 | 1.4092 |
| ZINC12892770 | 1.5065 |
| ZINC02543436 | 1.6168 |
| ZINC03157475 | 1.6918 |

**Table S4.** 5HT6  
compounds learning set  
from ChEMBL database

|               |
|---------------|
| CHEMBL3329438 |
| CHEMBL3692995 |
| CHEMBL1084794 |
| CHEMBL398034  |
| CHEMBL1085462 |
| CHEMBL1086326 |
| CHEMBL3692882 |
| CHEMBL1083654 |
| CHEMBL1085120 |
| CHEMBL1086113 |
| CHEMBL368209  |
| CHEMBL1085658 |
| CHEMBL24474   |
| CHEMBL1086252 |
| CHEMBL3692990 |
| CHEMBL3692993 |
| CHEMBL3692968 |
| CHEMBL3696966 |
| CHEMBL1082763 |
| CHEMBL3692867 |
| CHEMBL365569  |
| CHEMBL1085037 |
| CHEMBL1084711 |
| CHEMBL1083886 |
| CHEMBL363792  |
| CHEMBL3692974 |
| CHEMBL3692910 |
| CHEMBL1922616 |
| CHEMBL3692894 |
| CHEMBL1085585 |
| CHEMBL394690  |
| CHEMBL1084336 |
| CHEMBL1085617 |
| CHEMBL1086079 |
| CHEMBL1086323 |
| CHEMBL3692988 |
| CHEMBL2413990 |
| CHEMBL3692989 |

|               |
|---------------|
| CHEMBL1083390 |
| CHEMBL3692997 |
| CHEMBL3692863 |
| CHEMBL1668590 |
| CHEMBL3692975 |
| CHEMBL3692971 |
| CHEMBL1084603 |
| CHEMBL1083781 |
| CHEMBL1082508 |
| CHEMBL373322  |
| CHEMBL372879  |
| CHEMBL2413982 |
| CHEMBL3692973 |
| CHEMBL46187   |
| CHEMBL3329430 |
| CHEMBL3329451 |
| CHEMBL3692864 |
| CHEMBL3329442 |
| CHEMBL175835  |
| CHEMBL1668584 |
| CHEMBL1083075 |
| CHEMBL1922632 |
| CHEMBL1922615 |
| CHEMBL3260311 |
| CHEMBL3696953 |
| CHEMBL3692866 |
| CHEMBL3696956 |
| CHEMBL3692996 |
| CHEMBL1668586 |
| CHEMBL1642864 |
| CHEMBL1201756 |
| CHEMBL3692901 |
| CHEMBL196410  |
| CHEMBL1086324 |
| CHEMBL1085038 |
| CHEMBL1084604 |
| CHEMBL1082762 |
| CHEMBL3669650 |
| CHEMBL3692942 |
| CHEMBL1668564 |
| CHEMBL3692992 |

|               |
|---------------|
| CHEMBL1950775 |
| CHEMBL3693000 |
| CHEMBL1950776 |
| CHEMBL3692994 |
| CHEMBL1668565 |
| CHEMBL3669657 |
| CHEMBL353552  |
| CHEMBL179926  |
| CHEMBL565723  |
| CHEMBL3696954 |
| CHEMBL96745   |
| CHEMBL194307  |
| CHEMBL3329453 |
| CHEMBL609994  |
| CHEMBL187865  |
| CHEMBL193400  |
| CHEMBL3329452 |
| CHEMBL1922614 |
| CHEMBL3669661 |
| CHEMBL3669687 |
| CHEMBL414628  |
